# Supplementary material for: Highly selective photocatalytic oxidation of biomass-derived chemicals to carboxyl compounds over Au/TiO2
Source: Royal Society of Chemistry journal article supplement (doi:10.1039/c6gc03022j), 2016-12-20
Supplement: c6gc03022j1.pdf [file c6gc03022j1.pdf]

## Supporting information for

### Highly selective photocatalytic oxidation of biomass-derived chemicals to carboxyl compounds over Au/TiO<sub>2</sub>

Baowen Zhou,<sup>a,b</sup> Jinliang Song,<sup>a,\*</sup> Zhanrong Zhang,<sup>a</sup> Zhiwei Jiang,<sup>a</sup> Pei Zhang<sup>a</sup> and Buxing Han<sup>a,b,\*</sup>

<sup>a</sup>Beijing National Laboratory for Molecular Sciences, Key Laboratory of Colloid and Interface and Thermodynamics, Institute of Chemistry, Chinese Academy of Sciences, Beijing 100190, P. R. China

<sup>b</sup>University of Chinese Academy of Sciences, Beijing 100049, P. R. China

E-mail: songjl@iccas.ac.cn; hanbx@iccas.ac.cn,

#### Table of Contents

|                   |    |
|-------------------|----|
| 1. Scheme S1..... | S2 |
| 2. Figure S1..... | S2 |
| 3. Figure S2..... | S3 |
| 4. Figure S3..... | S3 |
| 5. Figure S4..... | S4 |
| 6. Figure S5..... | S4 |
| 7. Figure S6..... | S5 |
| 8. Figure S7..... | S5 |
| 9. Figure S8..... | S6 |

## 1. Scheme S1

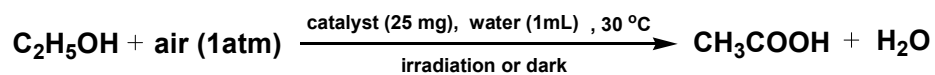

**Scheme S1.** Light-induced selective oxidation of ethanol to acetic acid in water at ambient temperature by air.

## 2. Figure S1

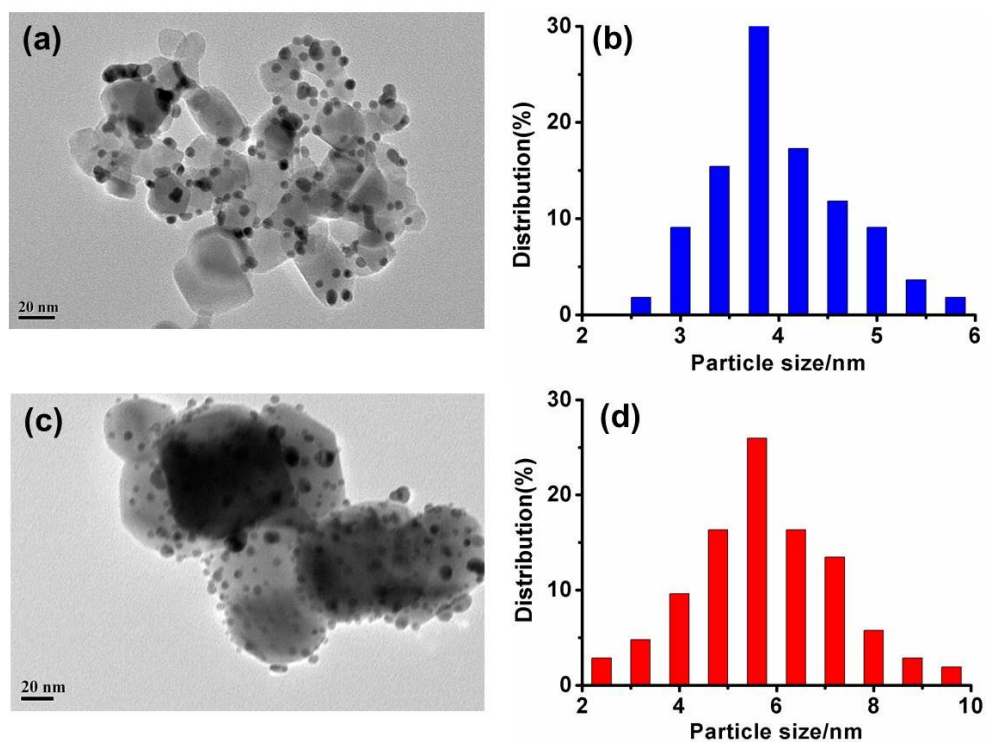

**Fig. S1.** TEM images and the size distribution of AuNPs/TiO<sub>2</sub> (a and b) and AuNPs/ZrO<sub>2</sub> (c and d) with 3 wt% AuNPs loading.

### 3. Figure S2

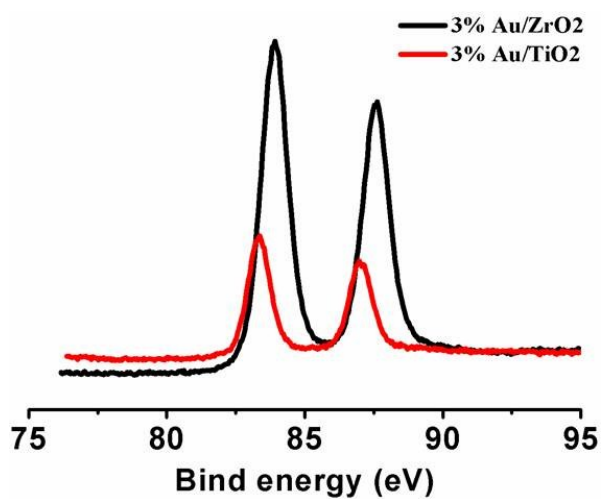

**Fig. S2.** XPS analysis of gold nanoparticles supported on  $\text{TiO}_2$  and  $\text{ZrO}_2$ .

### 4. Figure S3

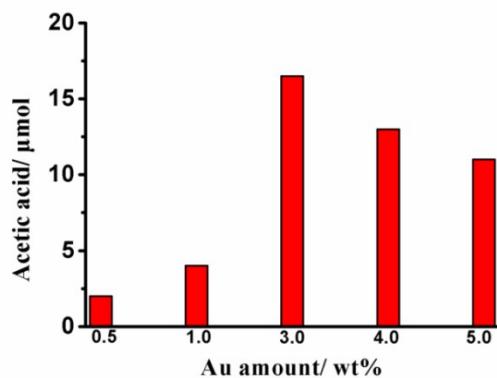

**Fig. S3.** The effect of the content of Au on the photocatalytic activity. Reaction conditions: ethanol, 100  $\mu\text{mol}$ ; water, 1 mL; AuNPs/ $\text{TiO}_2$ , 0.025 g; visible light ( $\lambda = 420\text{-}780\text{ nm}$ ,  $0.3\text{ W/cm}^2$ );  $\text{Na}_2\text{CO}_3$ , 100  $\mu\text{mol}$ ; temperature,  $30\text{ }^\circ\text{C}$ .

## 5. Figure S4

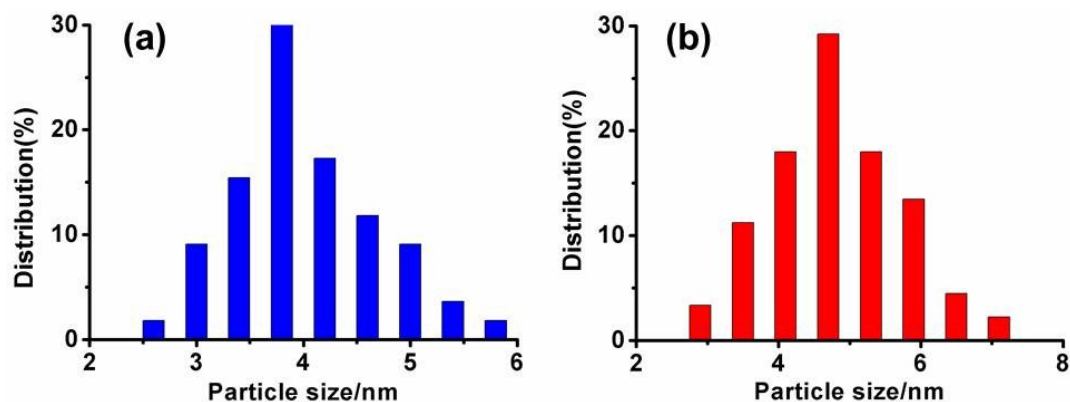

**Fig. S4.** The size distribution of AuNPs/TiO<sub>2</sub> with different AuNPs loading. 3 wt% (a) and 5 wt% (b).

## 6. Figure S5

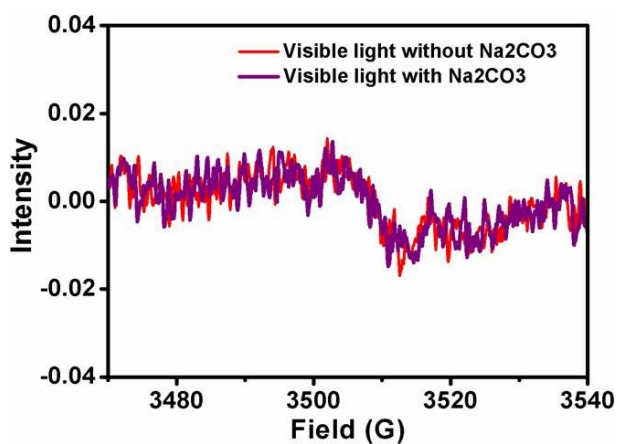

**Fig. S5.** Typical ESR spectra of DMPO trapped radical species upon photocatalytic oxidation of H<sub>2</sub>O over AuNPs/TiO<sub>2</sub> with and without Na<sub>2</sub>CO<sub>3</sub> under visible light irradiation.

## 7. Figure S6

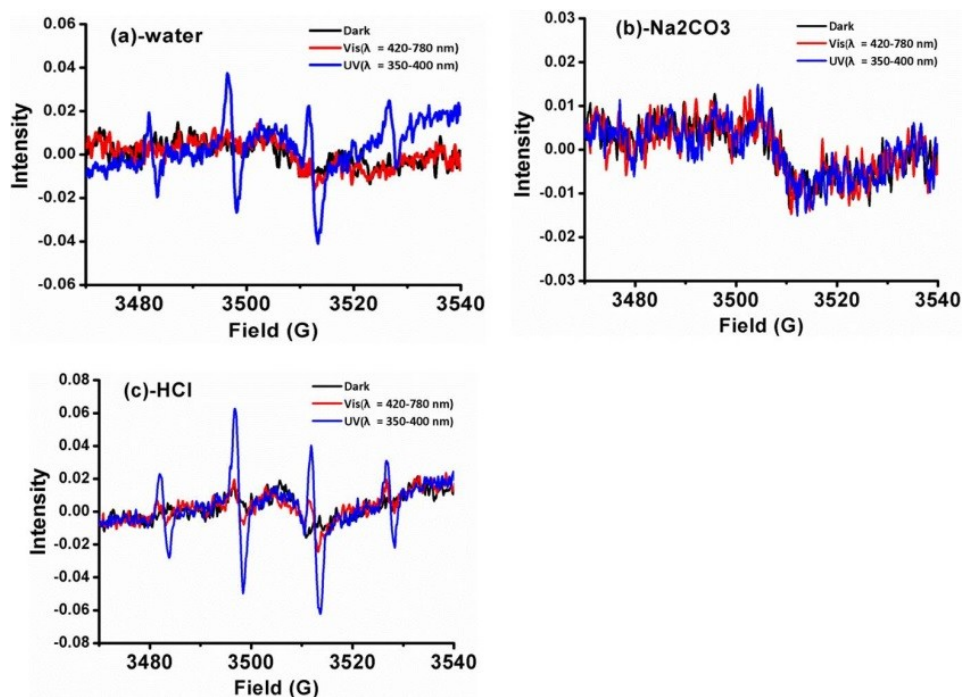

**Fig. S6.** Dependence of hydroxyl radical formation on the additives under UV and visible light irradiation.

## 8. Figure S7

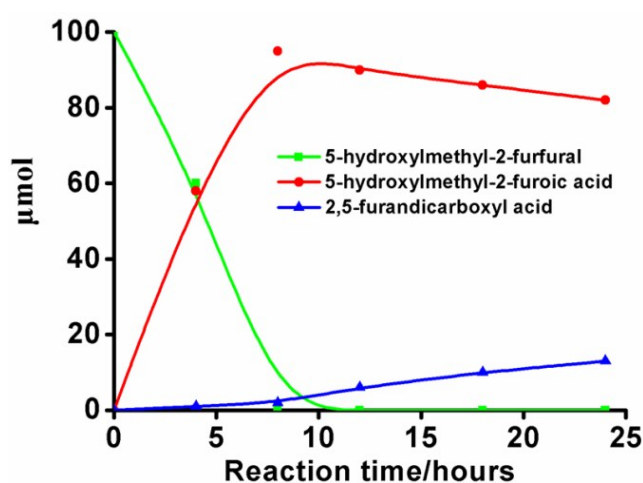

**Fig. S7.** Time course of the photooxidation of 5-hydroxymethyl-2-furfural over AuNPs/TiO<sub>2</sub> under visible light. Reaction conditions: substrate, 100 μmol; water, 1 mL; AuNPs/TiO<sub>2</sub> with 3 wt% Au, 0.025 g; visible light ( $\lambda = 420\text{-}780\text{ nm}$ ,  $0.3\text{ W/cm}^2$ ); Na<sub>2</sub>CO<sub>3</sub>, 200 μmol; temperature, 30 °C.

**9. Figure S8**

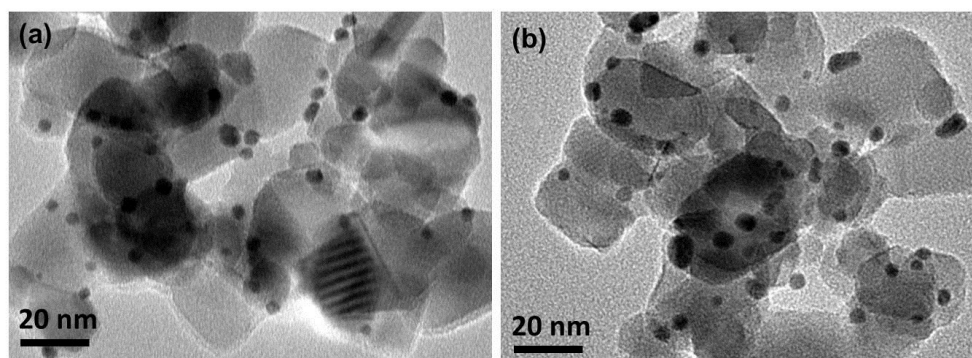

**Fig. S8.** TEM images of fresh AuNPs/TiO<sub>2</sub> and AuNPs/TiO<sub>2</sub> after four cycle reuse.
